# Supplementary material for: A Pt–Ir nanocube amplified lateral flow immunoassay for dehydroepiandrosterone
Source: Royal Society of Chemistry journal article supplement (doi:10.1039/d0an02293d), 2021-01-01
Supplement: d0an02293d1.pdf [file d0an02293d1.pdf]

## Supporting Information

### **Pt-Ir nanocubes amplified lateral flow immunoassay for dehydroepiandrosterone**

Huiyi Yang<sup>a</sup>; Qiyi He<sup>a</sup>; Junkang Pan<sup>a</sup>; Ding Shen<sup>a</sup>; Huanxin Xiao<sup>a</sup>; Xiping Cui<sup>a,\*</sup>;

Suqing Zhao<sup>a,\*</sup>

*<sup>a</sup>Department of Pharmaceutical Engineering, School of Biomedical and  
Pharmaceutical Sciences, Guangdong University of Technology, Guangzhou 510006,  
People's Republic of China*

\*Corresponding Author:

Prof. Suqing Zhao

Tel.: +86 15820258676

E-mail address: sqzhao@gdut.edu.cn (S.-Q. Zhao)

Dr. Xiping Cui

Tel.: +86 18813758818

E-mail address: cuixiping1989@163.com (X.-P. Cui)

E-mail addresses for other authors:

iyiuhgnay@163.com (H.-Y. Yang); chesto36@163.com (Q.-Y. He);

kang36576@163.com (J.-K. Pan); shending92@163.com (D. Shen);

hxq323723@163.com (H.-X. Xiao);

## **1. Materials and apparatus**

### **1.1 Chemicals**

Dehydroepiandrosterone (DHEA), dexamethasone (DXMS),  $\beta$ -estradiol (E2), cortisol (COR), dehydroepiandrosterone sulfate (DHEAs), progesterone (PRG), androstenedione (ASD), testosterone (TET), chloroplatinic acid hexahydrate ( $\text{H}_2\text{PtCl}_6 \cdot 6\text{H}_2\text{O}$ ), potassium hexachloroiridate ( $\text{K}_2\text{IrCl}_6$ ), ascorbic acid (AA), hexadecyltrimethylammonium chloride (CTAC), thiourea,  $\text{NaN}_3$  and p-benzoquinone (PBQ) were obtained from Aladdin Co. Ltd. (Shanghai, China). Tetramethylbenzidine (TMB) was purchased from Sigma Co. Ltd. (St. Louis, USA). Goat-anti-rabbit IgG was purchased from Bioss Co. Ltd. (Shanghai, China). Polyclonal antibody against DHEA (pAb) was prepared in previous work<sup>1</sup>. NC membrane (Sartorius CN140), wicking pad (H5072), adhesive backing (DB-6), sample pad (NJ-Y2) and conjugate pad (Ahlstrom 8964) were obtained from Jieyi Co. Ltd. (Shanghai, China). 3D-printed bracket was obtained in previous work.<sup>2</sup> PBS (0.01 M, pH 7.4) was prepared by using 8.0 g NaCl, 2.9 g  $\text{Na}_2\text{HPO}_4$  and 0.2 g  $\text{NaH}_2\text{PO}_4$  in 1000 mL distilled water. Artificial urine was prepared by using 2.5 g urea, 0.25 g  $\text{Na}_2\text{HPO}_4$ , 0.25 g  $\text{NaH}_2\text{PO}_4$ , 0.90 g NaCl, 0.30 g  $\text{NH}_4\text{Cl}$ , 0.20 g creatinine and 0.30 g sodium sulfite in 100 mL distilled water.<sup>3</sup> All the chemicals used in this study were analytical reagent grade. Solutions were prepared with ultrapure water from a Millipore Milli-Q water purification system (Billerica, MA).

### **1.2 Apparatus**

Transmission electron microscope (TEM) was conducted with a HT7700

microscope (Hitachi, Japan). Scanning electron microscopy (SEM) image was obtained through a SU8010 microscope (Hitachi, Japan). The ultraviolet spectrogram was measured by Lambda 25 UV/VIS spectrophotometer (PerkinElmer, USA). Zeta potential was determined by Zetasizer Nano ZS (Malvern, UK). Electron spin resonance (ESR) spectrum was measured by the use of a Bruker A300 spectrometer (Bruker, Germany).

## Figure and table captions

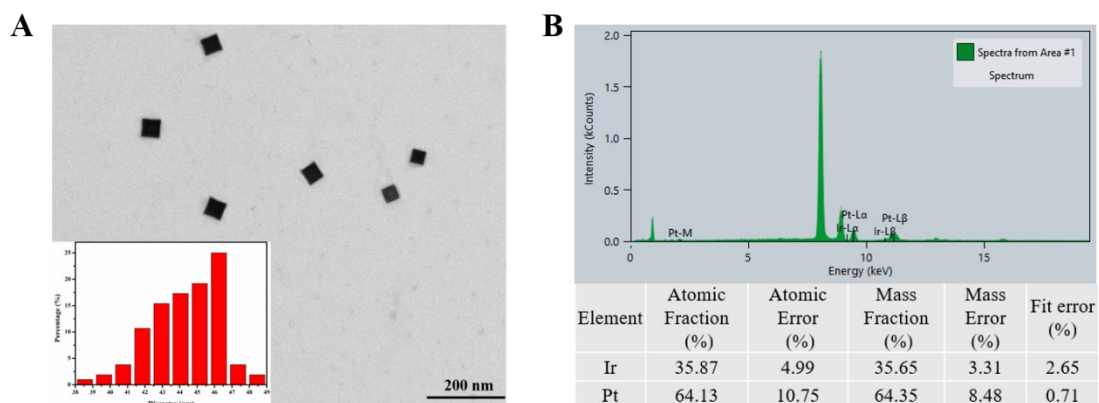

**Fig. S1** (A) TEM image of PtNCs and the corresponding histogram of diameter; (B) EDX spectrum and element content of Pt-Ir NCs.

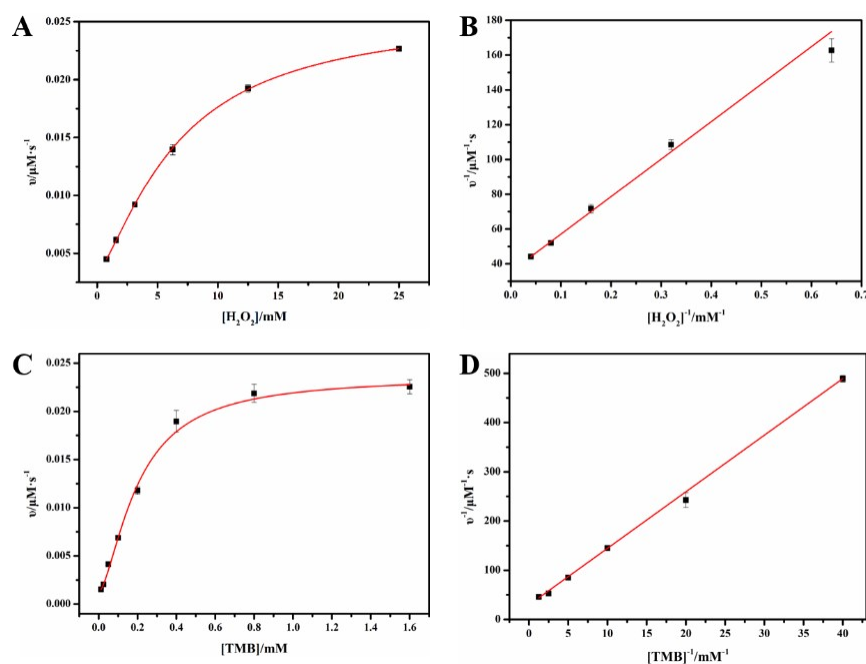

**Fig. S2** Steady-state kinetic assay of Pt-Ir NCs. (A)  $\text{H}_2\text{O}_2$  concentration and (C) TMB concentration dependence of initial reaction velocity ( $v$ ); Double reciprocal plots between reaction velocity and (B)  $\text{H}_2\text{O}_2$  concentration and (D) TMB concentration. Error bars denote the standard deviation ( $n=3$ ).

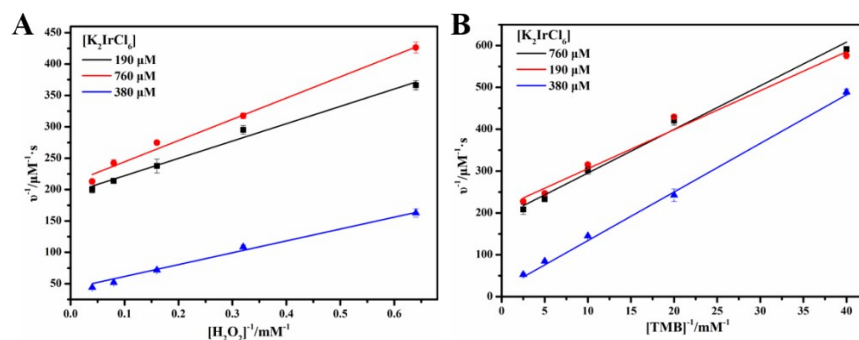

**Fig. S3** Steady-state kinetic assay of Pt-Ir NCs prepared by different concentration of  $\text{K}_2\text{IrCl}_6$ . Double reciprocal plots between reaction velocity and (A)  $\text{H}_2\text{O}_2$  concentration and (B) TMB concentration. Error bars denote the standard deviation ( $n=3$ ).

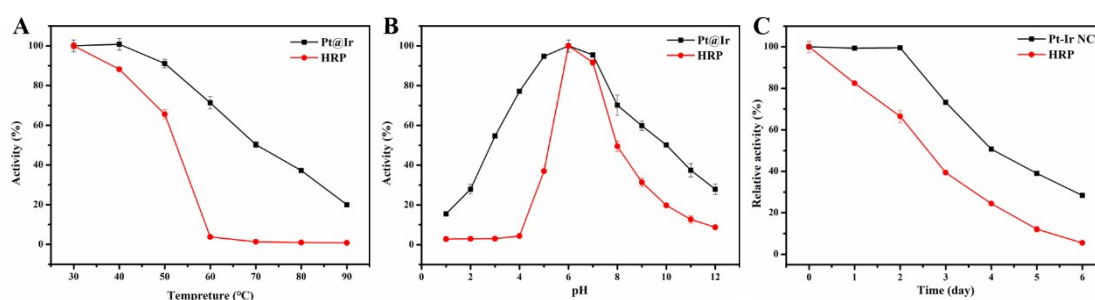

**Fig. S4** Comparison of different types of stability under different conditions of Pt-Ir NCs and free HRP. (A) Chemical stability, (B) thermal stability and (C) storage stability at  $37^{\circ}\text{C}$ . Error bars denote the standard deviation ( $n=3$ ).

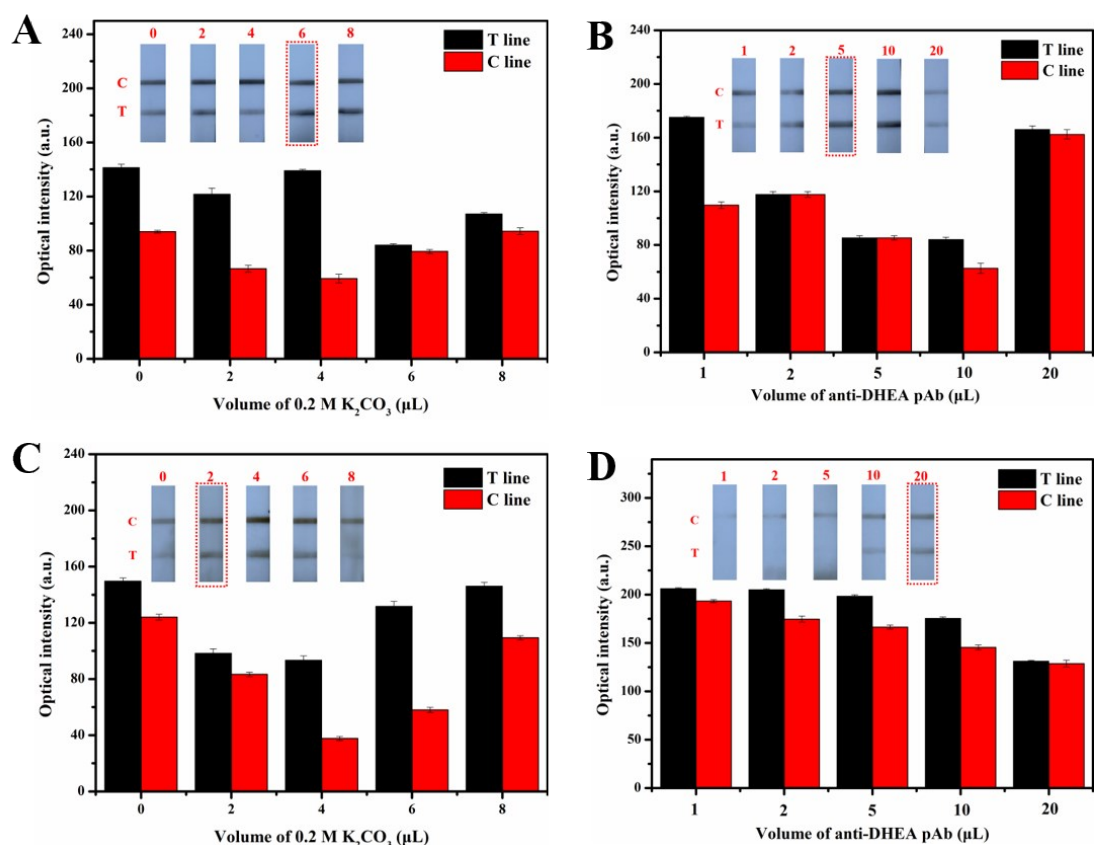

**Fig. S5** Optimization of preparation parameters of the pAb-Pt-Ir and pAb-PtNCs probes. (A) The volume selection of 0.2 M  $K_2CO_3$  ( $\mu L$ ) performed in the pAb-Pt-Ir probe; (B) The volume selection of anti-DHEA pAb ( $\mu L$ ) performed in the pAb-Pt-Ir probe; (C) The volume selection of 0.2 M  $K_2CO_3$  ( $\mu L$ ) performed in the pAb-PtNCs probe; (D) The volume selection of anti-DHEA pAb ( $\mu L$ ) performed in the pAb-PtNCs probe.

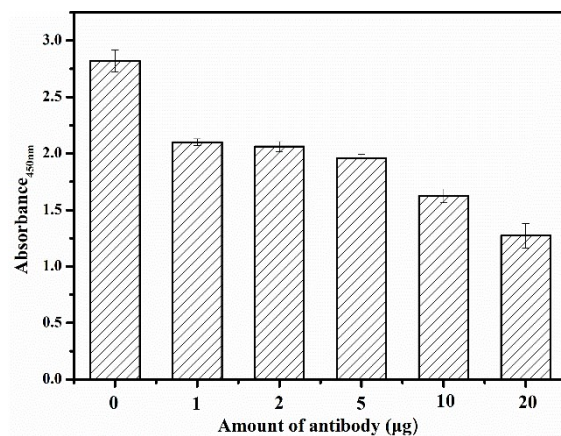

**Fig. S6** Effect of amount of antibody on catalytic activity of Pt-Ir NCs.

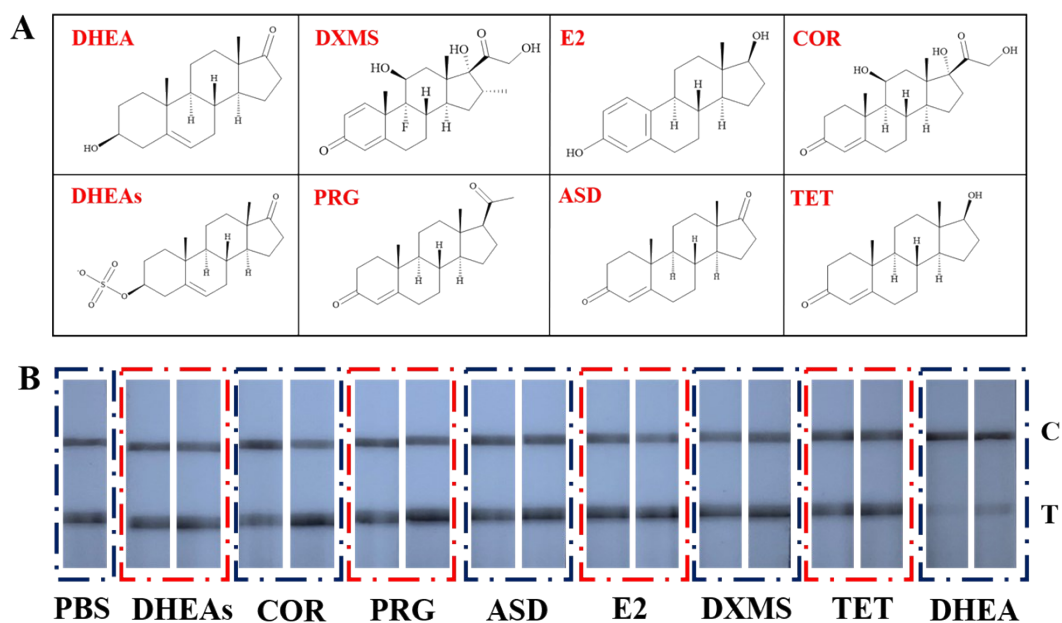

**Fig. S7** (A) The structure of DHEA analogues; (B) Specificity research results of the Pt-Ir-LFIA immunosensor. 10,000 (right) and 1,000 ng·mL<sup>-1</sup> (left) of DHEA and its structural analogues were used in the assay. PBS buffer was used as negative control. All experiments were performed in triplicate.

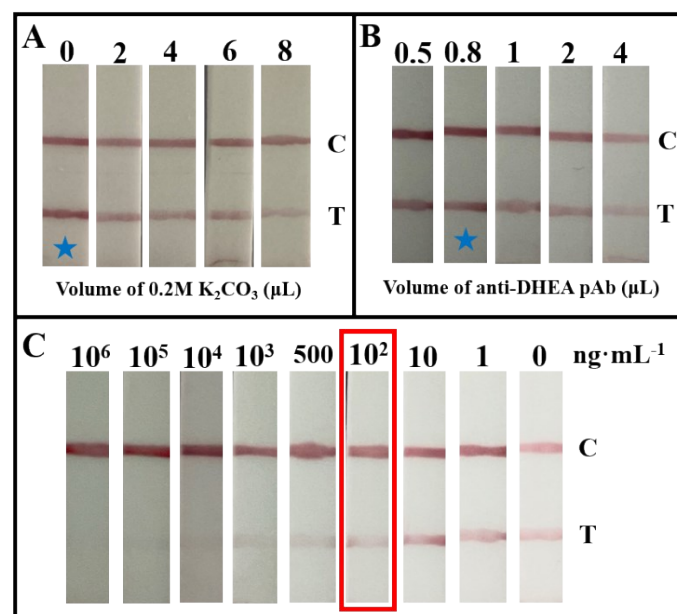

**Fig. S8** Optimization of preparation parameters of the pAb-AuNPs. (A) The volume selection of 0.2 M  $K_2CO_3$  (μL) performed in the pAb-AuNPs; (B) The volume selection of anti-DHEA pAb (μL) performed in the pAb-AuNPs probe; (C) Photographic results of AuNPs-LFIA for detection of DHEA by naked eyes.

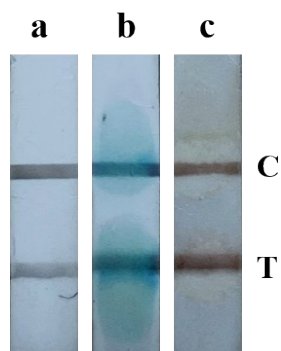

**Fig. S9** Effects of different chromogenic reagent (a: none b: TMB and c: AEC) on the detection signal of Pt-Ir NCs.



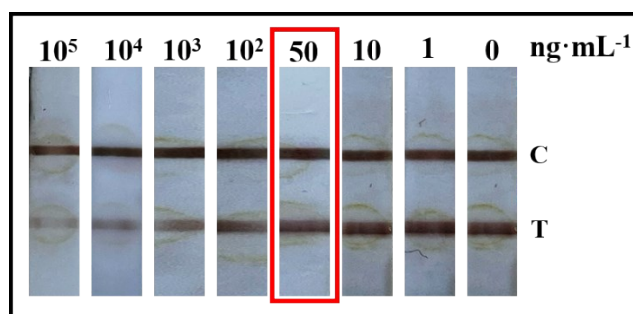

**Fig. S10** Photographic results of enhanced PtNCs-based LFIA for DHEA by naked eyes; All experiments were performed in triplicate.

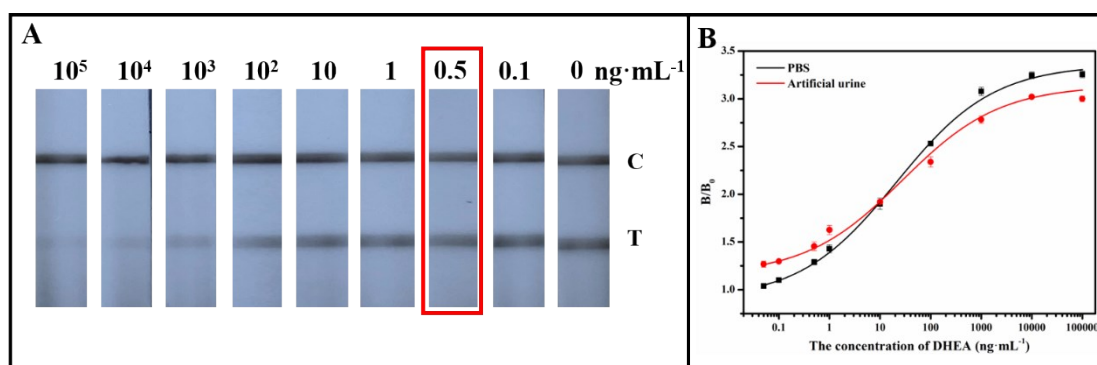

**Fig. S11** (A)Photo images of Pt-Ir-based LFIA for DHEA in artificial urine; (B) Calibration curves in PBS buffer and artificial urine with Pt-Ir-LFIA. All experiments were performed in triplicate.

**Table S1** Apparent steady-state kinetic parameters for Pt-Ir NCs and other metallic NPs peroxidase mimics.

| Enzyme or<br>Enzyme mimic      | $K_m$ (mM)             |       | $v_{max}$ ( $10^{-8} \text{ M}\cdot\text{s}^{-1}$ ) |        | Ref       |
|--------------------------------|------------------------|-------|-----------------------------------------------------|--------|-----------|
|                                | $\text{H}_2\text{O}_2$ | TMB   | $\text{H}_2\text{O}_2$                              | TMB    |           |
| HRP                            | 3.70                   | 0.43  | 8.71                                                | 10.00  | 4         |
| Platinum nanostructurs         | 769.00                 | 0.12  | 185.00                                              | 126.00 | 5         |
| PtNPs/GO                       | 221.10                 | 0.19  | 10.45                                               | 10.20  | 6         |
| Pt <sub>200</sub> -JP          | 9.344                  | 0.719 | 12.49                                               | 51.33  | 7         |
| Pt/PCN                         | 7.37                   | 1.06  | 23.50                                               | 23.12  | 8         |
| Ag-Pt/rGO                      | 1.25                   | 3.24  | 16.7                                                | 20     | 9         |
| Pd@Pt NDs                      | 14                     | 0.43  | 9                                                   | 5.1    | 10        |
| Au@Pt                          | 4.076                  | 2.431 | 6.013                                               | 4.425  | 11        |
| PtNCs                          | 17.20                  | 2.96  | 3.27                                                | 6.52   | This work |
| Pt-Ir NCs (190 $\mu\text{M}$ ) | 7.01                   | 2.28  | 3.62                                                | 10.70  | This work |
| Pt-Ir NCs (760 $\mu\text{M}$ ) | 6.2                    | 1.84  | 2.95                                                | 9.50   | This work |
| Pt-Ir NCs (380 $\mu\text{M}$ ) | 4.13                   | 0.38  | 2.60                                                | 3.4    | This work |

## References

1. H. Yang, Q. He, Y. Chen, D. Shen, H. Xiao, S. A. Eremin, X. Cui and S. Zhao, *Mikrochim Acta*, 2020, **187**, 592.
2. Q. He, H. Yang, J. Pan, X. Cui, D. Shen, S. A. Eremin, Y. Fang and S. Zhao, *ACS Applied Bio Materials*, 2020, **3**, 8849-8856.
3. D. C. Kabiraz, K. Morita, K. Sakamoto, M. Takahashi and T. Kawaguchi, *Talanta*, 2018, **186**, 521-526.
4. J. Li, G. Zhang, L. Wang, A. Shen and J. Hu, *Talanta*, 2015, **140**, 204-211.
5. Z. Gao, M. Xu, L. Hou, G. Chen and D. Tang, *Anal Chim Acta*, 2013, **776**, 79-86.
6. L. N. Zhang, H. H. Deng, F. L. Lin, X. W. Xu, S. H. Weng, A. L. Liu, X. H. Lin, X. H. Xia and W. Chen, *Anal Chem*, 2014, **86**, 2711-2718.
7. X. Guo, Y. Suo, X. Zhang, Y. Cui, S. Chen, H. Sun, D. Gao, Z. Liu and L. Wang, *Analyst*, 2019, **144**, 5179-5185.
8. W. Shi, H. Fan, S. Ai and L. Zhu, *Sensors and Actuators B: Chemical*, 2015, **221**, 1515-1522.
9. L. Yao, F. Y. Kong, Z. X. Wang, H. Y. Li, R. Zhang, H. L. Fang and W. Wang, *Mikrochim Acta*, 2020, **187**, 410.
10. C. Ge, R. Wu, Y. Chong, G. Fang, X. Jiang, Y. Pan, C. Chen and J.-J. Yin, *Advanced Functional Materials*, 2018, **28**.
11. D. Wei, X. Zhang, B. Chen and K. Zeng, *Anal Chim Acta*, 2020, **1126**, 106-113.
